# Supplementary material for: One minute from pristine carbon to an electrocatalyst for hydrogen peroxide production
Source: Royal Society of Chemistry journal article supplement (doi:10.1039/c9ta04788c), 2019-01-01
Supplement: c9ta04788c1.pdf [file c9ta04788c1.pdf]

## Supporting Information

### One Minute from Pristine Carbon to Electrocatalyst for Hydrogen Peroxide Production

Yun-Lu Wang <sup>a</sup>, Shi-Song Li <sup>a</sup>, Xiao-Hong Yang <sup>b</sup>, Guo-Yong Xu <sup>c</sup>, Zi-Chun Zhu <sup>b</sup>,  
Ping Chen <sup>a,c,d\*</sup>, Shan-Qing Li <sup>b\*</sup>

<sup>a</sup> School of Chemistry and Chemical Engineering, Anhui University, Hefei, Anhui,  
230601, P. R. China

<sup>b</sup> School of Chemistry and Materials Engineering, Chizhou University, Chizhou,  
Anhui, 247000, P. R. China

<sup>c</sup> Institute of Physical Science and Information Technology, Anhui University, Hefei,  
230601, P. R. China

<sup>d</sup> Anhui Province Key Laboratory of Chemistry for Inorganic/Organic Hybrid  
Functionalized Materials, Hefei, 230601, P. R. China

**\*Correspondence to:** Prof. Ping Chen (E-mail: [chenping@ahu.edu.cn](mailto:chenping@ahu.edu.cn)) or Dr. Shan-  
Qing Li (E-mail: [shanqingli@czu.edu.cn](mailto:shanqingli@czu.edu.cn))

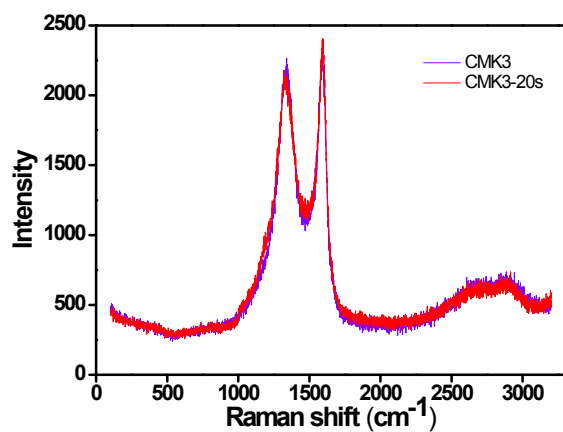

Figure S1 Raman spectra of CMK3 and CMK3-20s.

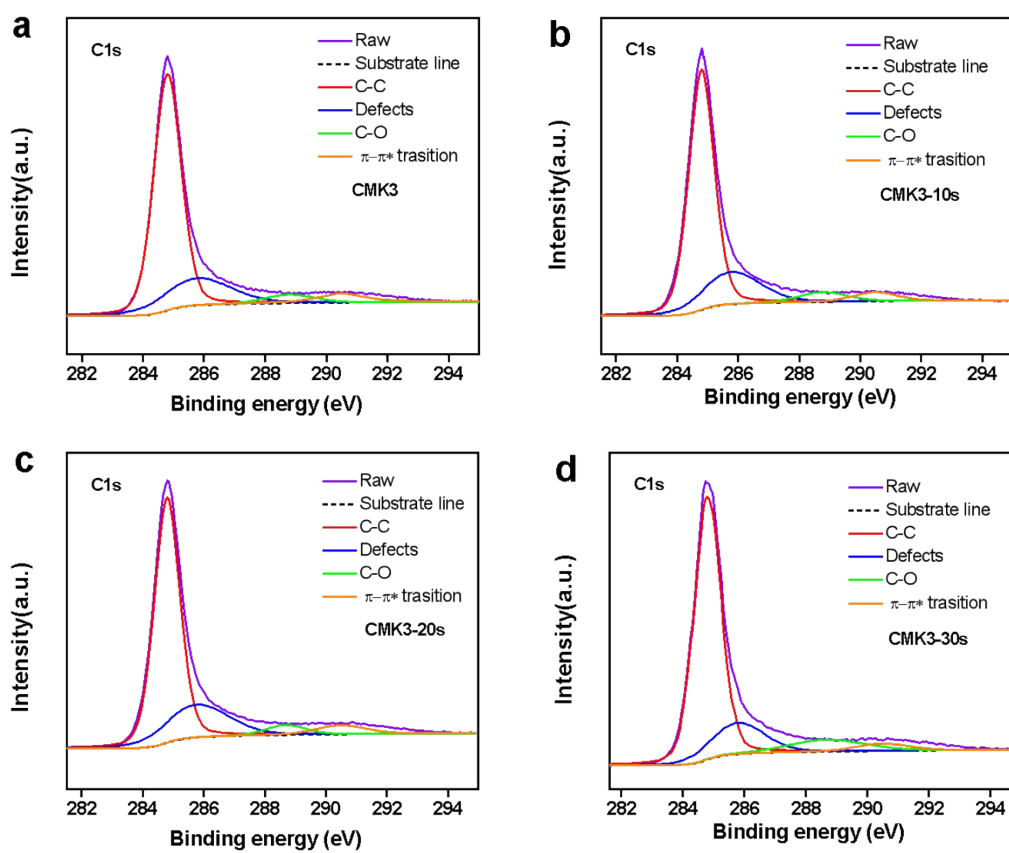

Figure S2 (a-d) High resolution C1s spectra of CMK3, CMK3-10s, CMK3-20s and CMK3-30s.

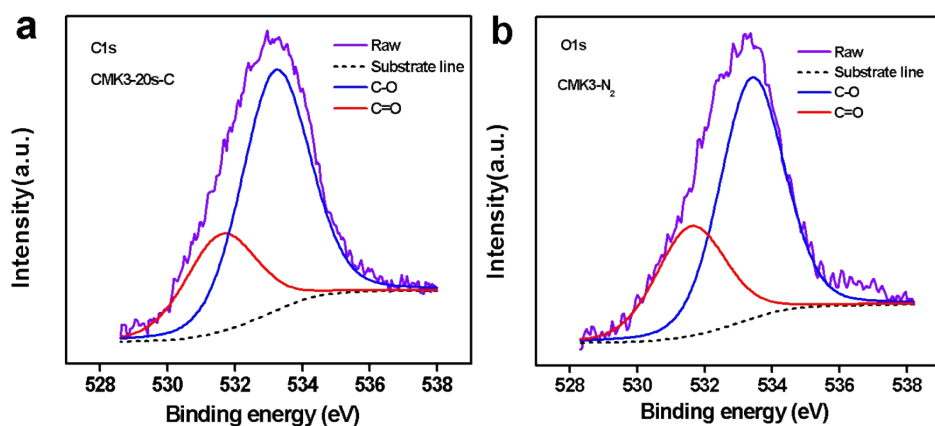

**Figure S3** (a) High resolution O1s spectrum of CMK3-20s-C; (b) High resolution O1s spectrum of CMK3-N<sub>2</sub>

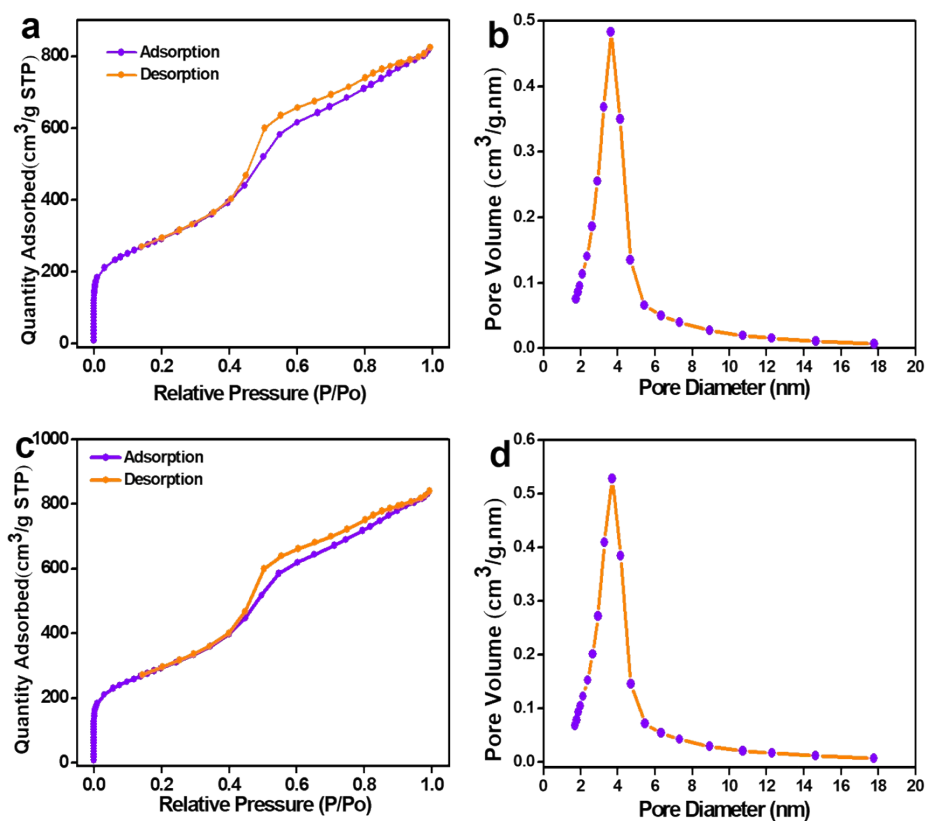

**Figure S4** (a-b) Nitrogen adsorption-desorption isotherm curve and pore size distribution of CMK3-10s; (c-d) Nitrogen adsorption-desorption isotherm curve and pore size distribution of CMK3-30s

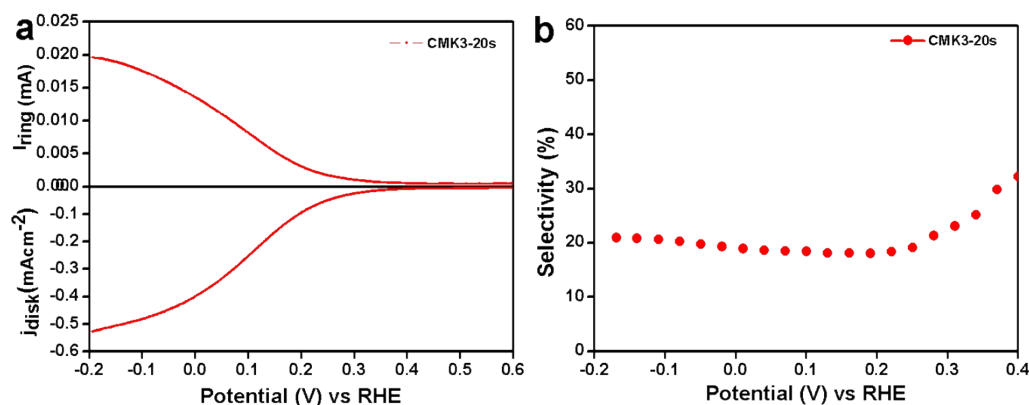

**Figure S5** (a) RRDE voltammograms of CMK3-20s in O<sub>2</sub>-saturated 0.5 M H<sub>2</sub>SO<sub>4</sub> (at rotating speed of 1,600 rpm, sweep rate of 10 mV s<sup>-1</sup>); (b) The selectivity of the peroxide yield obtained from the RRDE curves for CMK3-20s in 0.5 M H<sub>2</sub>SO<sub>4</sub>.

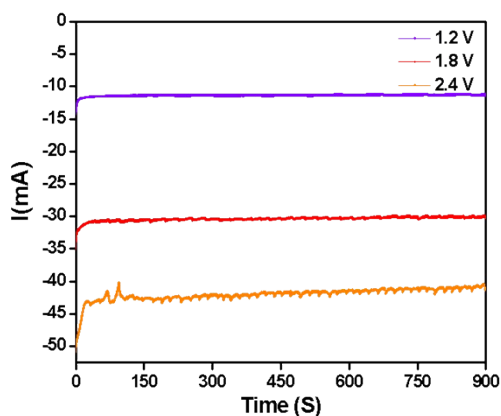

**Figure S6** I-t curve of CMK3-20s measured at the different applied potentials the flow cell (0.1 M KOH).

**Table. S1** Content of carbon and oxygen elements in CMK3, CMK3-10s, CMK3-20s and CMK3-30s, and the ratio of functional groups containing oxygen element.

| Sample   | C at. % | O at. % | (C=O) % | (C-O) % |
|----------|---------|---------|---------|---------|
| CMK3     | 96.2    | 2.85    | 33      | 67      |
| CMK3-10s | 95.8    | 3.22    | 28      | 72      |
| CMK3-20s | 96.2    | 2.97    | 24      | 76      |
| CMK3-30s | 96.1    | 2.93    | 21      | 79      |

**Table. S2** The value of BET surface area, pore volume and pore diameter of CMK3, CMK3-10s, CMK3-20s and CMK3-30s.

| <b>Sample</b> | <b>BET surface area<br/>(m<sup>2</sup>/g)</b> | <b>Total Pore Volume<br/>(cm<sup>3</sup>/g)</b> | <b>average pore diameter<br/>(nm)</b> |
|---------------|-----------------------------------------------|-------------------------------------------------|---------------------------------------|
| CMK3          | 1,009.4                                       | 1.32                                            | 4.00                                  |
| CMK3-10s      | 1,017.4                                       | 1.28                                            | 4.01                                  |
| CMK3-20s      | 1,018.8                                       | 1.30                                            | 4.05                                  |
| CMK3-30s      | 1,054.6                                       | 1.34                                            | 4.01                                  |

**Table. S3** Comparison of performance of different samples with the prepared CMK3-20s

| Sample                               | pH | Potential<br>(V vs. Ag/<br>AgCl) | [H <sub>2</sub> O <sub>2</sub> ]<br>(mg L <sup>-1</sup> h <sup>-1</sup> ) | Faradaic<br>Efficiency<br>(%) | Ref.         |
|--------------------------------------|----|----------------------------------|---------------------------------------------------------------------------|-------------------------------|--------------|
| O-CNTs                               | 14 | -0.24                            | 197.5                                                                     | ~95                           | [1]          |
| o-GOMC-1                             | 13 | -0.23                            | ~55                                                                       | 99                            | [2]          |
| AGF1100                              | 13 | -0.7                             | ~385                                                                      | 72.3                          | [3]          |
| Nitrogen-<br>doped mesoporous carbon | 13 | -0.85                            | ~70                                                                       | 70                            | [4]          |
| Vulcan carbon                        | 13 | -0.7                             | ~55                                                                       | 41.0                          | [5]          |
| CeO <sub>2</sub> /C                  | 13 | -0.7                             | ~100                                                                      | 44                            | [5]          |
| Biomass derived N/C<br>catalyst      | 13 | -0.67                            | 2.04                                                                      | 40                            | [6]          |
| Carbon supported MnO <sub>2</sub>    | 7  | -0.7                             | 100                                                                       | none                          | [7]          |
| N-O-P-Carbon-800                     | 13 | -0.7                             | 320                                                                       | 95                            | [8]          |
| rGO-PEI aerogel                      | 13 | -0.2                             | ~160                                                                      | 90.7                          | [9]          |
| CMK3-20s                             | 13 | -0.55                            | 421                                                                       | 92.5                          | This<br>work |

### Supporting References

1. Z. Lu; G. Chen; S. Siahrostami; Z. Chen; K. Liu; J. Xie; L. Liao; T. Wu; D. Lin; Y. Liu; T. F. Jaramillo; J. K. Norskov; Y. Cui, *Nature Catalysis* 2018, *1*, 156-162
2. Y. J. Sa; J. H. Kim; S. H. Joo, *Angewandte Chemie-International Edition* 2019, *58*, 1100-1105

3. Z. Pan; K. Wang; W. Yi; P. Tsiakaras; S. Song, *Applied Catalysis B Environmental* 2018, 237, S0926337318305113
4. Y. Sun; I. Sinev; W. Ju; A. Bergmann; S. Dresp; S. Kuehl; C. Spoeri; H. Schmies; H. Wang; D. Bernsmeier; B. Paul; R. Schmack; R. Kraehnert; B. Roldan Cuenya; P. Strasser, *Acs Catalysis* 2018, 8, 2844-2856
5. F. Hasché; M. Oezaslan; P. Strasser; T. P. Fellingner, *Journal of Energy Chemistry* 2016, 25, 251
6. Y. Yang; F. He; Y. Shen; X. Chen; H. Mei; S. Liu; Y. Zhang, *Chemical Communications* 2017, 53, 9994-9997
7. L. R. Aveiro; A. G. M. D. Silva; V. S. Antonin; E. G. Candido; L. S. Parreira; R. S. Geonmonond; I. C. D. Freitas; M. R. V. Lanza; P. H. C. Camargo; M. C. Santos, *Electrochimica Acta* 2018, 268, S0013468618303682
8. H. X. Zhang; S. C. Yang; Y. L. Wang; J. C. Xi; J. C. Huang; J. F. Li; P. Chen; R. Jia, *Electrochimica Acta* 2019, 308, 74-82
9. X. Xiao; T. Wang; J. Bai; F. Li; T. Ma; Y. Chen, *Acs Applied Materials & Interfaces* 2018, 10, 42534-42541
